# Supplementary material for: Revealing working mechanisms of PFN as a cathode interlayer in conventional and inverted polymer solar cells
Source: Royal Society of Chemistry journal article supplement (doi:10.1039/c9cp03862k), 2019-01-01
Supplement: c9cp03862k1.pdf [file c9cp03862k1.pdf]

## Electronic Supplementary Information

### Revealing Working Mechanisms of PFN as a Cathode Interlayer in Conventional and Inverted Polymer Solar Cells

Hongwei Zhang,<sup>†</sup> Weilong Zhou,<sup>†</sup> Chengzhuo Yu,<sup>†</sup> Jianhua Guo and Fenghong Li \*

State Key Laboratory of Supramolecular Structure and Materials, Institute of Theoretical Chemistry, Jilin University, Changchun 130012, P. R. China.

\*E-mail: fhli@jlu.edu.cn (F. H. Li)

<sup>†</sup>H. W. Zhang, W. L. Zhou and C. Z. Yu contributed equally to this work.

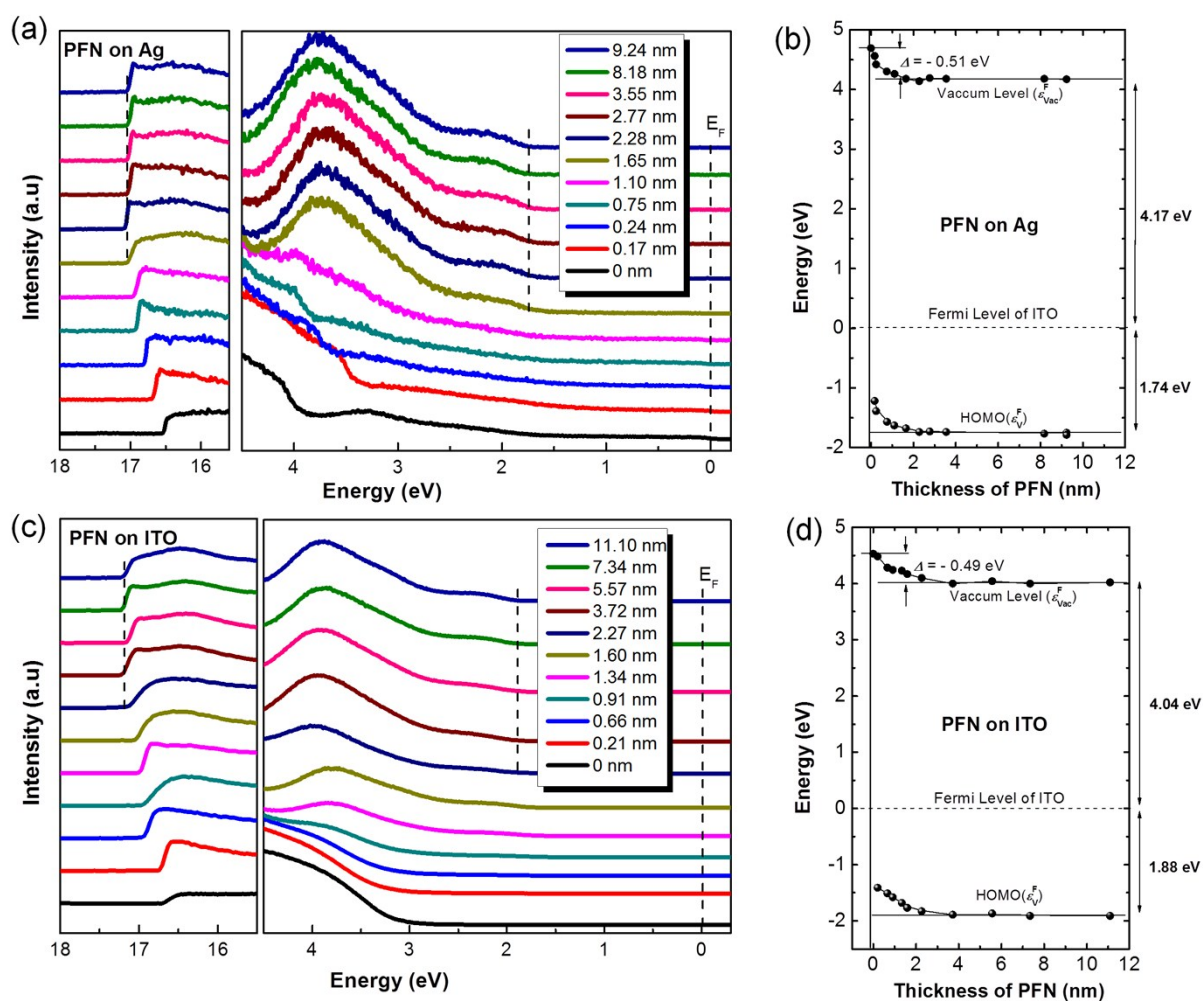

Figure S1. UPS spectra of various thickness PFN layer spin-coated on Ag (a) and ITO (c). Evolution of the WF and HOMO with the variation in thickness of PFN on Ag (b) and ITO (d).

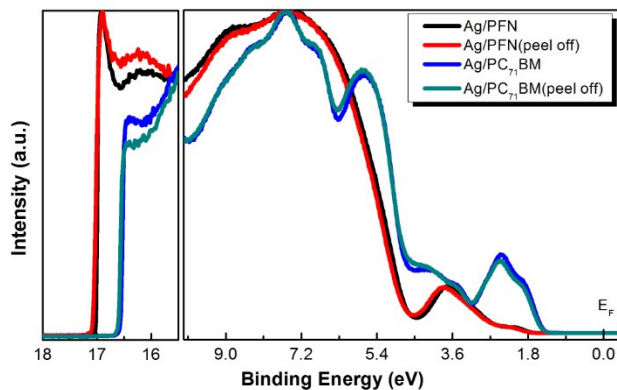

Figure S2. UPS spectra of PFN and PC<sub>71</sub>BM films prepared by spin-coating method and “Peel-off” method on Ag.

Table S1. Work function ( $\phi$ ), HOMO level *versus* Fermi level ( $E_{HOMO}$ ) and HOMO level *versus* vacuum level ( $IP$ ) of PFN and PC<sub>71</sub>BM films prepared by spin-coating method and “Peel-off” method on Ag. All values are shown in unit of eV.

| Devices                          | $\Phi_{WF}$ | $E_{HOMO}$ | $IP$ |
|----------------------------------|-------------|------------|------|
| Ag/PFN                           | 4.19        | 1.72       | 5.91 |
| Ag/PFN(peel off)                 | 4.16        | 1.76       | 5.92 |
| Ag/PC <sub>71</sub> BM           | 4.66        | 1.46       | 6.12 |
| Ag/PC <sub>71</sub> BM(peel off) | 4.62        | 1.48       | 6.10 |

Table S2. Work function ( $\phi$ ), HOMO level *versus* Fermi level ( $E_{HOMO}$ ) and HOMO level *versus* vacuum level ( $IP$ ) of Al/LiF covered by various organic films.

| Devices                                 | $\phi$ | $E_{\text{HOMO}}$ | IP   |
|-----------------------------------------|--------|-------------------|------|
| Al/LiF                                  | 3.45   | -                 | -    |
| Al/LiF/PC <sub>71</sub> BM              | 4.32   | 1.81              | 6.13 |
| Al/LiF/PC <sub>71</sub> BM/PFN(0.07 nm) | 4.22   | 1.80              | 6.05 |
| Al/LiF/PC <sub>71</sub> BM/PFN(0.25 nm) | 4.13   | 1.82              | 5.95 |
| Al/LiF/PC <sub>71</sub> BM/PFN(0.44 nm) | 4.09   | 1.84              | 5.93 |
| Al/LiF/PC <sub>71</sub> BM/PFN(0.65 nm) | 4.06   | 1.83              | 5.91 |
| Al/LiF/PC <sub>71</sub> BM/PFN(1.04 nm) | 4.01   | 1.90              | 5.91 |
| Al/LiF/PC <sub>71</sub> BM/PFN(3.08 nm) | 3.91   | 1.98              | 5.89 |

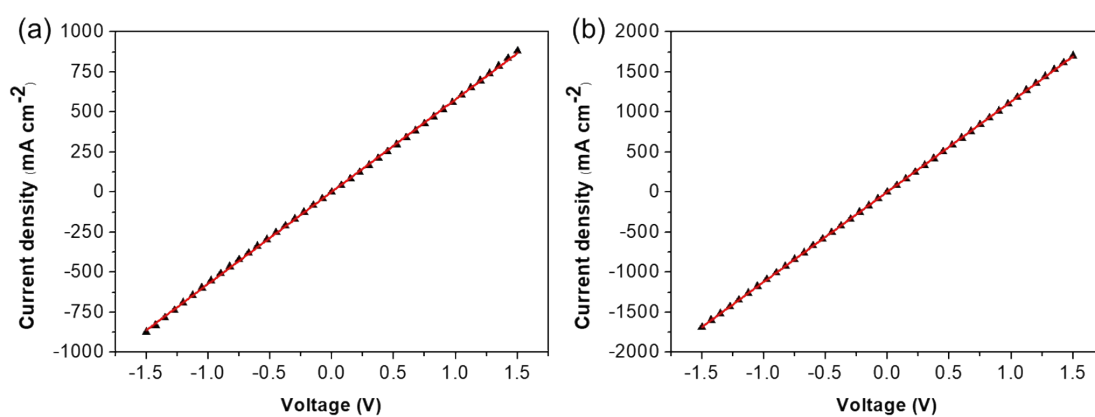

Figure S3. Conductivity measurements of PC<sub>71</sub>BM in (a) ITO/PC<sub>71</sub>BM(20nm)/PFN(2nm)/Al and (b) ITO/PFN(2nm)/PC<sub>71</sub>BM(20nm)/Al.

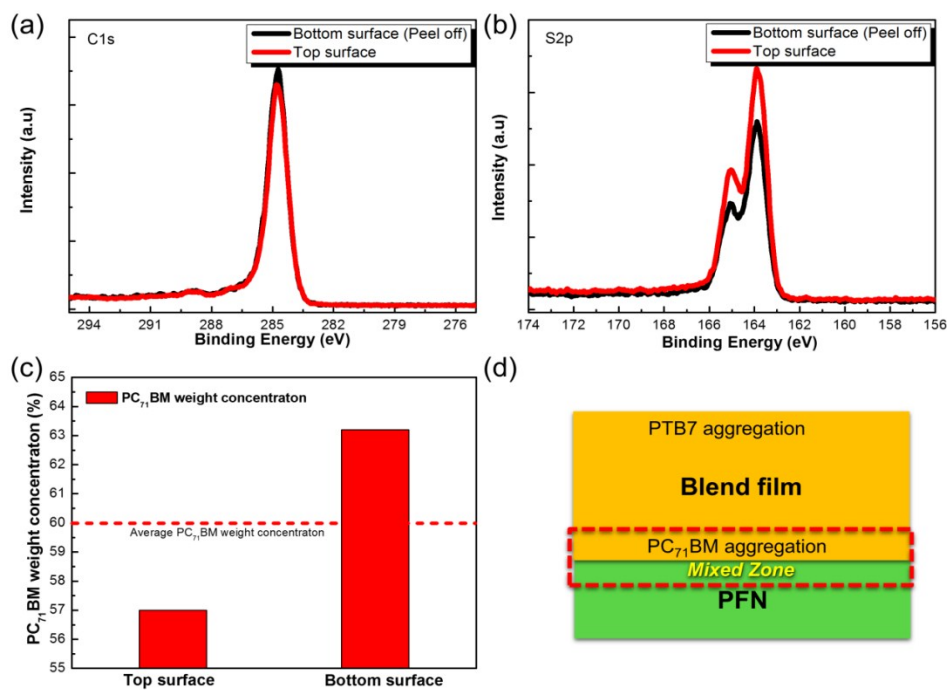

Figure S4. XPS spectra of (a) C1s and (b) S2p of PTB7:PC<sub>71</sub>BM blend film at top and bottom surfaces. (c) The PC<sub>71</sub>BM weight concentration in the blend film at top and bottom surfaces. (d) Schematic illustration for distribution of PTB7 and PC<sub>71</sub>BM in the blend film.
